# Supplementary material for: Efficient Generation of Cardiac Purkinje Cells from ESCs by Activating cAMP Signaling
Source: PubMed Central journal article supplement — Stem Cell Reports. 2015 May 28;4(6):1089–102. doi: 10.1016/j.stemcr.2015.04.015 (PMC4471825; doi:10.1016/j.stemcr.2015.04.015), 2015-05-28
Supplement: mmc1.pdf [file mmc1.pdf]

**Stem Cell Reports**

**Supplemental Information**

**Efficient Generation of Cardiac Purkinje Cells  
from ESCs by Activating cAMP Signaling**

**Su-Yi Tsai, Karen Maass, Jia Lu, Glenn I. Fishman, Shuibing Chen, and Todd Evans**

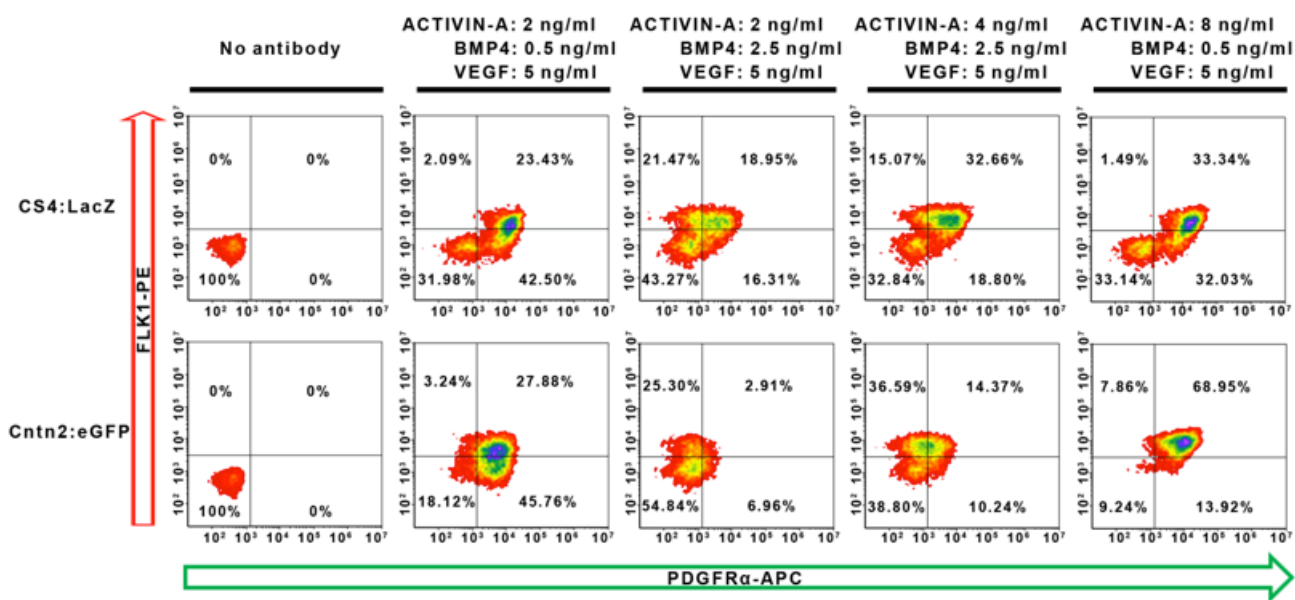

Data of Primary Screen

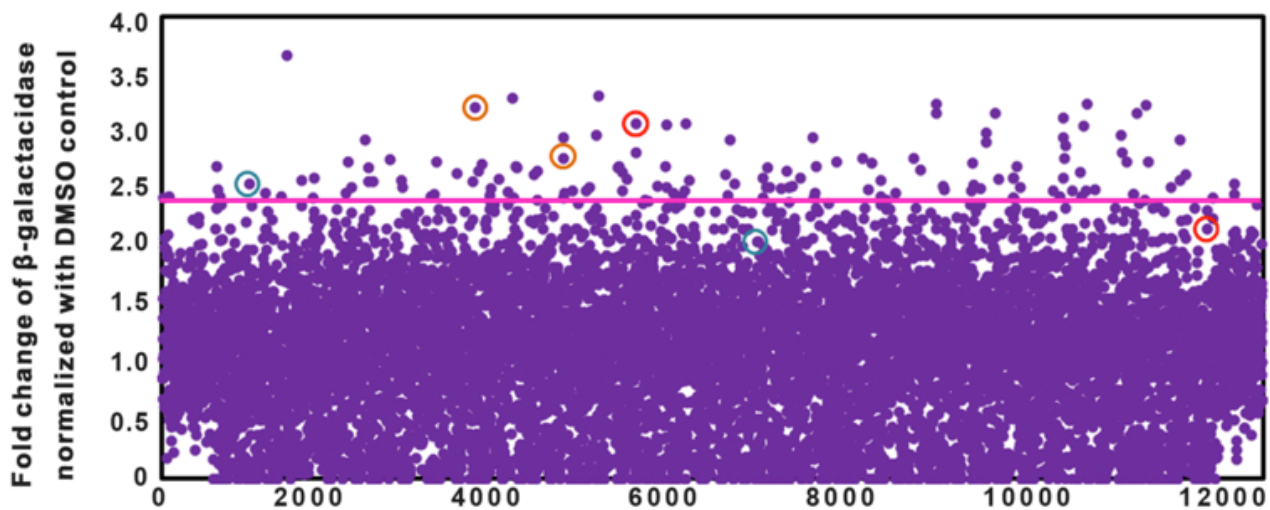

**Supplemental Figure S1. Optimization of cytokine induction for reporter ESC lines and primary screen results.** Top: Flow plots of FLK-1 and PDGFR- $\alpha$  expression. CS4:LacZ and Cntn2:eGFP ESC cell lines were treated with indicated concentrations of BMP4, ACTIVIN-A and VEGF and the FLK1 and PDGFR- $\alpha$  expression in both lines evaluated by flow cytometry analysis. CS4:LacZ cells and Cntn2:eGFP cells are shown in the upper and lower panels, respectively. PDGFR- $\alpha$ <sup>+</sup> and FLK1<sup>+</sup> expression is shown in the X-axis and Y-axis, respectively.

Bottom: Each dot represents one compound at one concentration. Approximately 5,000 compounds were examined at two different concentrations (10 and 1  $\mu$ M). Y-axis shows fold change of  $\beta$ -galactosidase activity normalized to DMSO control. Primary hit compounds that had 2.5 fold or more increasing levels of  $\beta$ -galactosidase activity were selected (above pink line). Three primary hit compounds were highlighted by different colors of circles. Red circles (SN treatment), orange circles (OA treatment) and blue circles (CH treatment) are indicated.

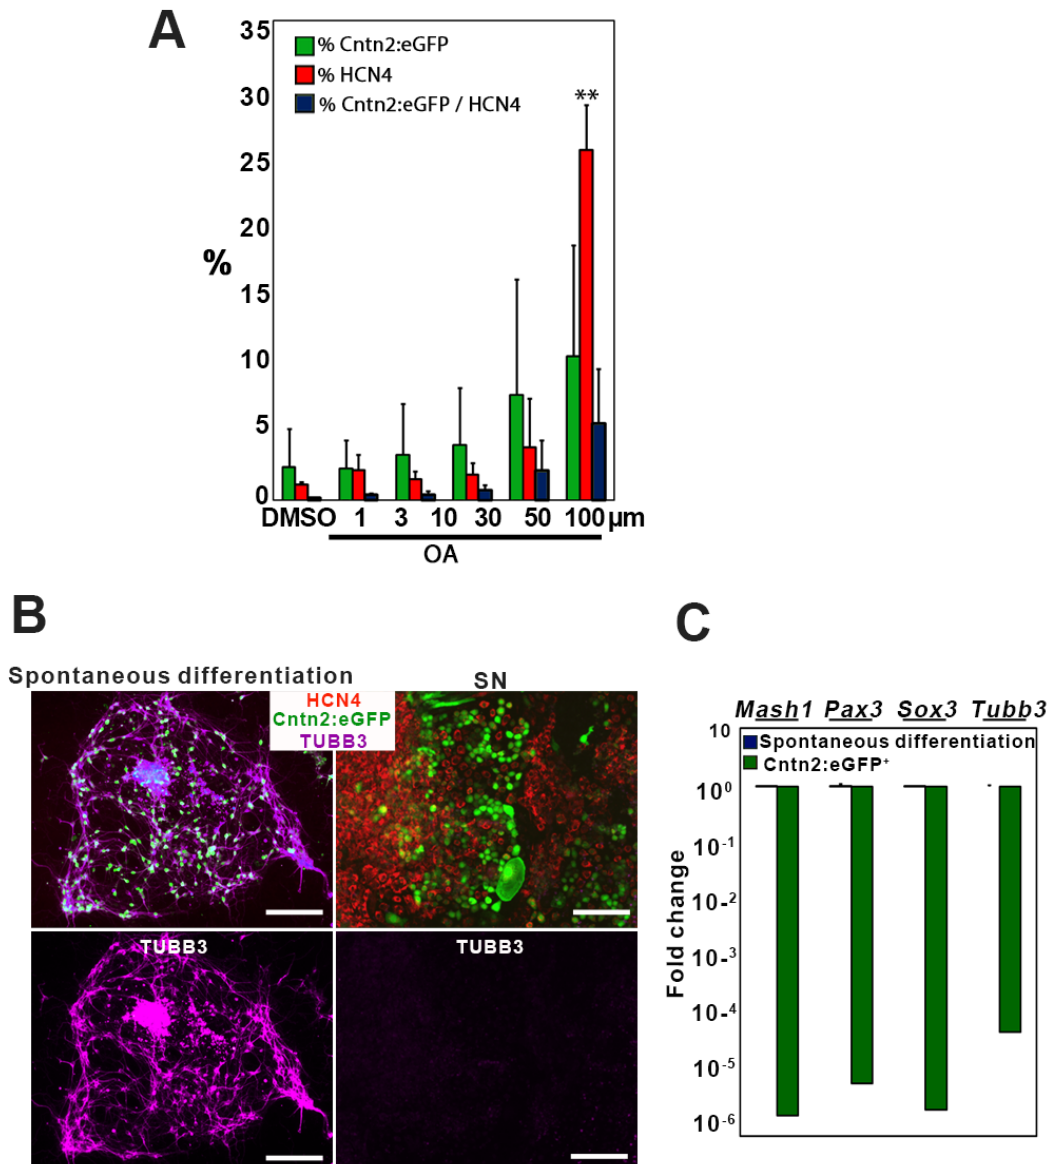

**Supplemental Figure S2. Oleic acid enhances cardiac conduction system marker HCN4 expression and Cntn2:eGFP<sup>+</sup> cells are not neural cells.**

A) Quantification of immunofluorescence staining of HCN4<sup>+</sup>, Cntn2:eGFP<sup>+</sup> and HCN4/Cntn2:eGFP double-positive cells by MetaExpress image analysis. The data are combined results from three independent differentiation experiments. Error bars are S.D. \*\* indicates p<0.01.

B) Expression of a well characterized neural marker, TUBB3, was examined by immunofluorescence staining. Triple-immunofluorescence staining of TUBB3, HCN4 and GFP in spontaneously differentiating cells is shown in the left panel. These cultures were used as a TUBB3 positive control sample. Co-immunofluorescence staining of GFP and HCN4 with TUBB3 in SN-treated cells is shown in the right panel. C) Quantification of transcript levels for neural genes *Mash1*, *Pax3*, *Sox3* and *Tubb3* were determined by qPCR.

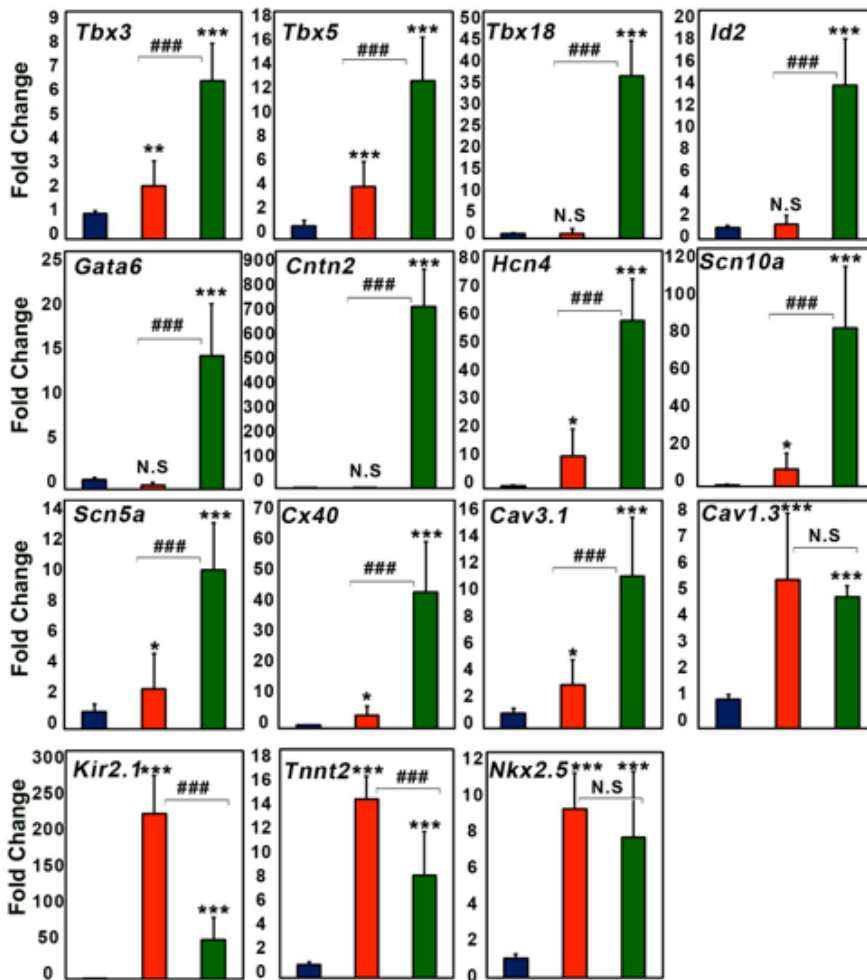

**Supplemental Figure S3. GFP<sup>+</sup> cells isolated from DMSO-treated cells express PC expression profiles comparable to the SN-induced GFP<sup>+</sup> cells.**

Gene expression profiles of three cell populations isolated from DMSO-treated cells (negative, blue bars, normalized to 1;  $\alpha$ Mhc:mCherry<sup>+</sup> (GFP-negative), red bars; Cntn2:eGFP<sup>+</sup> (mCherry-dim), green bars) analyzed by qPCR. Comparison for significance of either mCherry<sup>+</sup> or eGFP<sup>+</sup> cell populations with the negative population is indicated by asterisks (\*). Comparison of Cntn2:eGFP<sup>+</sup> cells with  $\alpha$ Mhc:mCherry<sup>+</sup> cells are shown by hashtags (#). Error bars show S.D. Results are from 3 independent experiments.

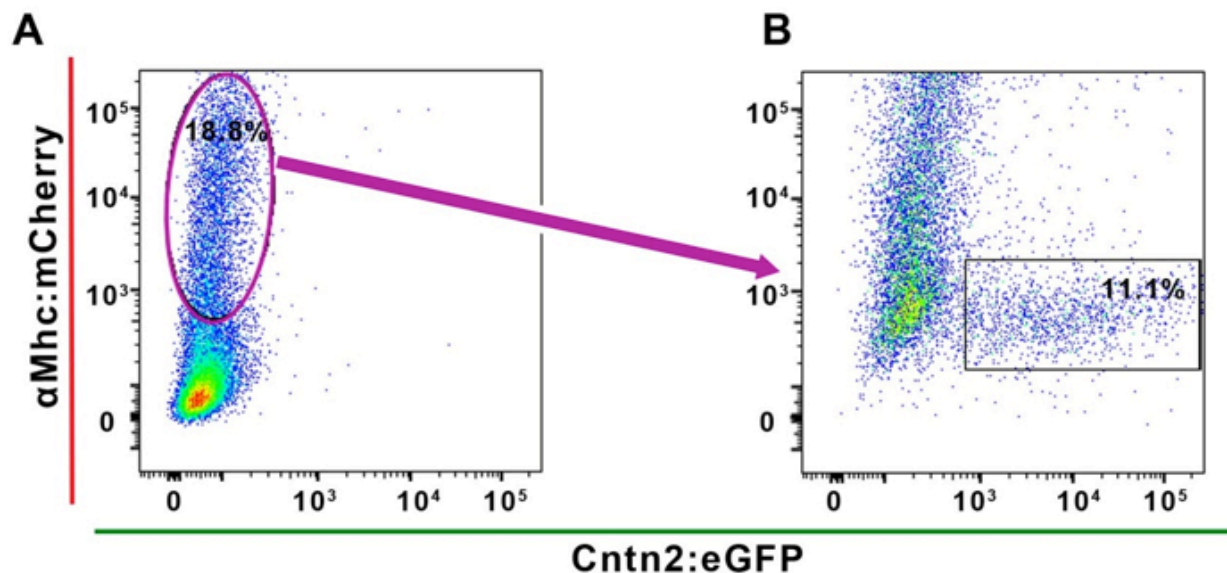

**Supplemental Figure S4. Cntn2:eGFP<sup>+</sup> cells are derived from  $\alpha$ Mhc:mCherry<sup>+</sup> cells.**

A) FACS plot of  $\alpha$ Mhc:mCherry/Cntn2:eGFP double reporter line at differentiation day 11.  $\alpha$ Mhc:mCherry<sup>+</sup> cells were sorted and re-cultured. B) Flow plot of Cntn2:eGFP positive cells that were analyzed after 14 days culture of the sorted mCherry<sup>+</sup> cells. Plot is representative of 3 reproducible independent experiments. Note that the double-positive cells are relatively mCherry<sup>dim</sup>.

**Table S1.**

Supplement Table S1. Chemical structure of 12 additional hit compounds from the initial chemical screen that were “cherry-picked” but otherwise not further evaluated.

| Name                                                               | Name of Library | Chemical Structure |
|--------------------------------------------------------------------|-----------------|--------------------|
| D(-)-2-Amino-5-phosphonopentanoic acid<br>NMDA receptor antagonist | LOPAC<br>L19    |                    |
| 1-Deoxynojirimycin<br>hydrochloride                                | LOPAC<br>I10    |                    |
| (R)(-)-α-Methylhistamine<br>dihydrochloride                        | LOPAC<br>L18    |                    |
| 5-Hydroxydecanoic acid<br>sodium salt                              | LOPAC<br>N18    |                    |
| Minoxidil                                                          | LOPAC<br>M14    |                    |
| 2-Phenylaminoadenosine                                             | LOPAC<br>C13    |                    |

|                                   |                 |                                                                                      |
|-----------------------------------|-----------------|--------------------------------------------------------------------------------------|
| (±)-Verapamil hydrochloride       | MicroSource D14 | 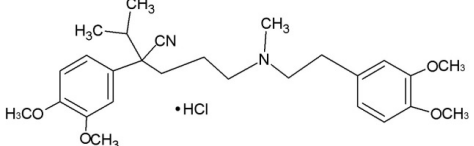   |
| Spermine                          | MicroSource E11 |    |
| Acetylsalicylic acid              | LOPAC G17       |    |
| Paromomycin sulfate salt          | LOPAC C11       |   |
| Diallyl Trisulfide                | Prestwick D11   |  |
| Pyridine-2-aldoxime methochloride | Prestwick N8    |  |

**Table S2.**

|                                | GFP-, n=12 | GFP+, n=8  |
|--------------------------------|------------|------------|
| Resting Potential, mV          | -67.8±0.6  | -69.2±1.0  |
| Action Potential Amplitude, mV | 114.5±3.0  | 122.2±1.9  |
| APD <sub>50</sub> , ms         | 127.3±26.8 | 315.2±53.7 |
| APD <sub>90</sub> , ms         | 196.1±30.9 | 395.9±54.2 |
| dV/dtmax, V/s                  | 82.5±12.9  | 122.6±13.9 |

**Supplemental Table S2. Characterization of the action potential in ESC derivatives.** Comparison of action potential (AP) properties (resting potential, action potential amplitude, maximum rate of rise of AP upstroke, APD<sub>50</sub> and APD<sub>90</sub>) between Cntn2:eGFP negative and positive cells.



**Supplemental Table S3. List of qPCR primers**

| <b>Gene</b>   | <b>Forward primer(5' to 3')</b> | <b>Reverse primer (5' to 3')</b> |
|---------------|---------------------------------|----------------------------------|
| <i>Gapdh</i>  | CTAACATCAAATGGGGTGAGG           | CGGAGATGATGACCCTTTTG             |
| <i>Tbx3</i>   | CCACCTCCAACAACACGTTCT           | TAAGGAAACAGGCTCCCGAA             |
| <i>Tbx5</i>   | CAGGAGCACAGCCAAATTTAC           | CCATGTACGGCTTCTTATAGGG           |
| <i>Tbx18</i>  | TGTCCCCCATCAAGCCTGTT            | ATGGCCTCCAGAATGCGTATG            |
| <i>Id2</i>    | AGGTGACCAAGATGGAAATC            | GCTCAGAAGGGAATTCAGAT             |
| <i>Nkx2.5</i> | CATTTTACCCGGGAGCCTAC            | CTTTGTCCAGCTCCACTGC              |
| <i>Gata6</i>  | TACACAAGCGACCACCTCAG            | GTAGAGGCCGTCTTGACCTG             |
| <i>Hcn4</i>   | TCCTTGATCCCTTCAGCTCT            | AGAGAATCCAGCCAGCTGTT             |
| <i>Cx30.2</i> | GCAGGAGGAGTTCGTGTGTA            | AGGATGTGGAAGAGCCAGA              |
| <i>Scn5a</i>  | GGGACTCATTGCCTACATGA            | GCACTGGGAGGTTATCACTG             |
| <i>Scn10a</i> | CTAGTCTGTTGTTTTCTGCG            | GCGAAGAGCAGCGTGCGAATC            |
| <i>Cntn2</i>  | CATGTCTTCAGCCACTGACC            | TGGCCTTGTCCTGGGTTAT              |
| <i>Cx40</i>   | GGAAGACGGGCTGTTCCA              | CCCATTTCAGAAAACAAACACA           |
| <i>Tnnt2</i>  | CAGAGGAGGCCAACGTAGAAG           | CTCCATCGGGGATCTTGGGT             |
| <i>Kir2.1</i> | GTGGCTTGTGACCCTCTGTA            | TCTCGACGCTTCTCTCTTGA             |
| <i>Cav1.3</i> | GTTGTAAGTGCGGTAGAAAGCA          | CTGGTGCCTCTTGATAGTTT             |
| <i>Cav3.1</i> | TAACCTGCTTGTGCGCCATT            | ACTCGTATCTTCCCGTTTGC             |
| <i>Mash1</i>  | ACTTGA ACTCTATGGCGGGTT          | CCAGTTGGTAAAGTCCAGCAG            |
| <i>Pax3</i>   | GCAGCGCAGGAGCAGAACCA            | GCACTCGGGCCTCGGTAAGC             |
| <i>Sox3</i>   | AAGATGCACA ACTCCGAGAT           | GTA CTTGTCCTTCTTGAGCAG           |
| <i>Tubb3</i>  | TGGCGCCTTTGGACACCTA             | AAGCCGGGCATGAAGAAGTG             |

**Supplemental Movie S1. Live imaging of  $\alpha$ Mhc:mCherry/Cntn2:eGFP double reporter line at differentiation day 12 to day 17.**

As shown by live imaging,  $\alpha$ Mhc:mCherry<sup>+</sup> cells can be seen at differentiation day 12. The first faint Cntn2:eGFP<sup>+</sup> cells can initially be seen at this time and the signal co-localizes with  $\alpha$ Mhc:mCherry<sup>+</sup> cells at 12 days and gradually increases in GFP intensity over 20 hr.
